# Supplementary material for: Insights on Ozone Formation Sensitivity in Southeast and East Asian Megacities during ASIA-AQ
Source: Copernicus journal article supplement (doi:10.5194/egusphere-2025-6434), 2026-01-08
Supplement: Supplementary file 1 [file egusphere-2025-6434-supplement.pdf]

# Supplementary Information of “Insights on Ozone Formation Sensitivity in Southeast and East Asian Megacities during ASIA-AQ”

Cho et al.

Correspondence to: Alessandro Franchin ([franchin@ucar.edu](mailto:franchin@ucar.edu))

5 **Table S1.** Summary of DC-8 research flights.

| Location    | Flight number | Flight date | Take-off time (LT) | Landing time (LT)  |
|-------------|---------------|-------------|--------------------|--------------------|
| Philippines | RF01          | 2024-02-06  | 09:42              | 18:05              |
|             | RF02          | 2024-02-07  | 09:05              | 16:57              |
|             | RF03          | 2024-02-11  | 08:59              | 16:43              |
|             | RF04          | 2024-02-15  | 09:08              | 17:22              |
| Thailand    | RF12          | 2024-03-16  | 10:09              | 17:58              |
|             | RF13          | 2024-03-18  | 08:25              | 16:35              |
|             | RF14          | 2024-03-21  | 08:11              | 16:09              |
|             | RF15          | 2024-03-25  | 08:03              | 15:55              |
| Taiwan      | RF05          | 2024-02-15  | 10:46 <sup>a</sup> | 15:14 <sup>a</sup> |
|             | RF11          | 2024-03-13  | 10:27 <sup>a</sup> | 13:03 <sup>a</sup> |
|             | RF16          | 2024-03-27  | 11:11 <sup>a</sup> | 14:00 <sup>a</sup> |
| South Korea | RF06          | 2024-02-17  | 10:55              | 18:17              |
|             | RF07          | 2024-02-26  | 10:57              | 18:25              |
|             | RF08          | 2024-03-08  | 10:19              | 18:47              |
|             | RF09          | 2024-03-10  | 12:13              | 18:51              |
|             | RF10          | 2024-03-11  | 10:14              | 18:48              |

<sup>a</sup> For Taiwan flights, the listed times correspond to the DC-8 sampling time over Taiwan rather than the full flight duration.

**Table S2.** Instrumentation details for data used in this study.

| Species                                               | Instrument (Method)                                                                                      | Reference                               |
|-------------------------------------------------------|----------------------------------------------------------------------------------------------------------|-----------------------------------------|
| Photolysis frequencies                                | CAFS (Charged-coupled device actinic spectroradiometers)                                                 | Hall et al. (2018)                      |
| Meteorological parameters                             | MMS (Meteorological measurement system)                                                                  | Gaines et al. (1992)                    |
| H <sub>2</sub> O                                      | DLH (Diode laser hygrometer)                                                                             | Diskin et al. (2002)                    |
| CO, CH <sub>4</sub>                                   | DACOM (Diode laser spectrometer)                                                                         | Sachse et al. (1987)                    |
| NO, NO <sub>2</sub> <sup>a</sup>                      | NO <sub>x</sub> O <sub>3</sub> (Chemiluminescence)                                                       | Ridley and Grahek (1990)                |
|                                                       | CANOE (Cavity enhanced absorption spectrometry)                                                          | Bailey et al. (2024)                    |
| O <sub>3</sub> <sup>b</sup>                           | NO <sub>x</sub> O <sub>3</sub> (Chemiluminescence)                                                       | Ridley et al. (1992)                    |
|                                                       | ROZE (Cavity-enhanced UV absorption)                                                                     | Hannun et al. (2020)                    |
| HCHO                                                  | ISAF (Laser-induced fluorescence)                                                                        | Cazorla et al. (2015)                   |
| PANs                                                  | GT-TD-CIMS (Thermal dissociation chemical ionization mass spectrometry using I <sup>-</sup> reagent ion) | Lee et al. (2020)                       |
| CHOCHO                                                | CAESAR (Cavity enhanced absorption spectroscopy)                                                         | Min et al. (2016)                       |
| HNO <sub>3</sub> , HCN, H <sub>2</sub> O <sub>2</sub> | CIT-CIMS (Chemical ionization mass spectrometry using CF <sub>3</sub> O <sup>-</sup> reagent ion)        | Crounse et al. (2006)                   |
| VOCs <sup>c</sup>                                     | TOGA-TOF (Online gas chromatography with time-of-flight mass spectrometry)                               | Apel et al. (2015); Jeong et al. (2025) |
|                                                       | WAS (Whole air sampler)                                                                                  | Simpson et al. (2020)                   |
|                                                       | PTR-ToF-MS (Proton-transfer-reaction time-of-flight mass spectrometry)                                   | Reinecke et al. (2023)                  |

<sup>a</sup> The primary NO<sub>2</sub> dataset is from NO<sub>x</sub>O<sub>3</sub>. Periods with calibration or instrument downtime were gap-filled with CANOE.

<sup>b</sup> Primary dataset depends on deployment: NO<sub>x</sub>O<sub>3</sub> for Metro Manila (MM); ROZE for Bangkok Metropolitan Region (BMR), Tainan-Kaohsiung Metropolitan Area (TKMA), and Seoul Metropolitan Area (SMA). Occasional gaps were filled using the alternate instrument.

<sup>c</sup> Alkanes, alkenes, and aromatics were taken primarily from WAS. TOGA-TOF provided biogenic VOCs (BVOCs) and oxidized VOCs (OVOCs). PTR-ToF-MS (selected aromatics and BVOCs) was used when both WAS and TOGA data were unavailable.

## S1 Average VOC reactivity speciation

VOC reactivity (VOCR) is defined as the sum of the reaction rate coefficients between OH and each measured VOC species ( $k_{\text{OH}+\text{VOC}_i}$ ), weighted by the concentration of that species ( $[\text{VOC}_i]$ ):

$$20 \quad \text{VOCR} = \sum k_{\text{OH}+\text{VOC}_i} [\text{VOC}_i] \quad (\text{S1})$$

In Figs. S1–S4, VOC shortform names are from Master Chemical Mechanism (MCMv3.3.1; available at: <https://www.mcm.york.ac.uk/MCM>).

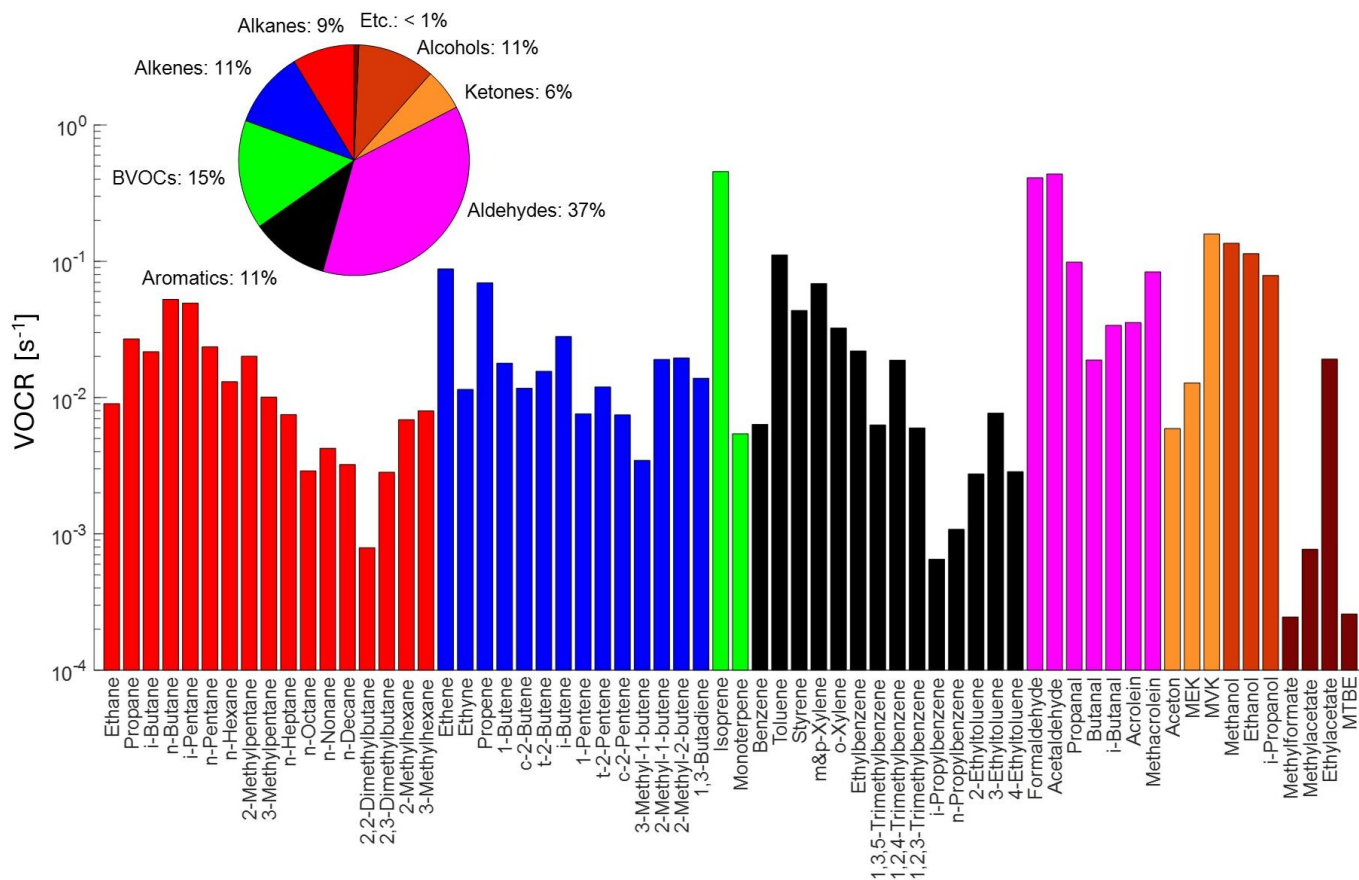

**Figure S1.** Contribution of individual VOC species to VOC reactivity (VOCR) measured in Metro Manila (MM) below 750 m above sea level (asl). The pie chart summarizes the average fractional contributions of VOC classes to VOCR.

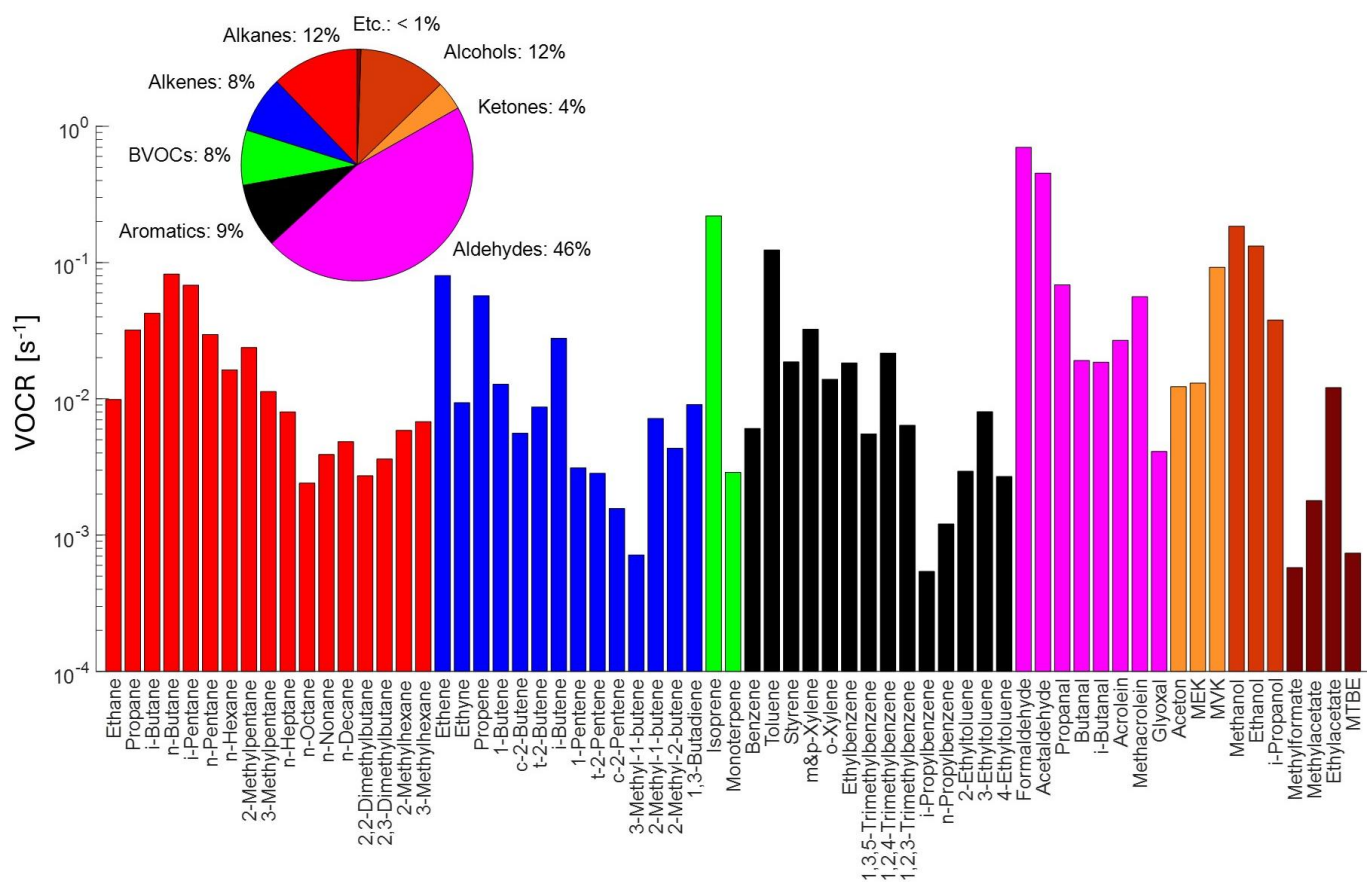

**Figure S2.** Contribution of individual VOC species to VOCR measured in Bangkok Metropolitan Region (BMR) below 750 m asl. The pie chart summarizes the average fractional contributions of VOC classes to VOCR.

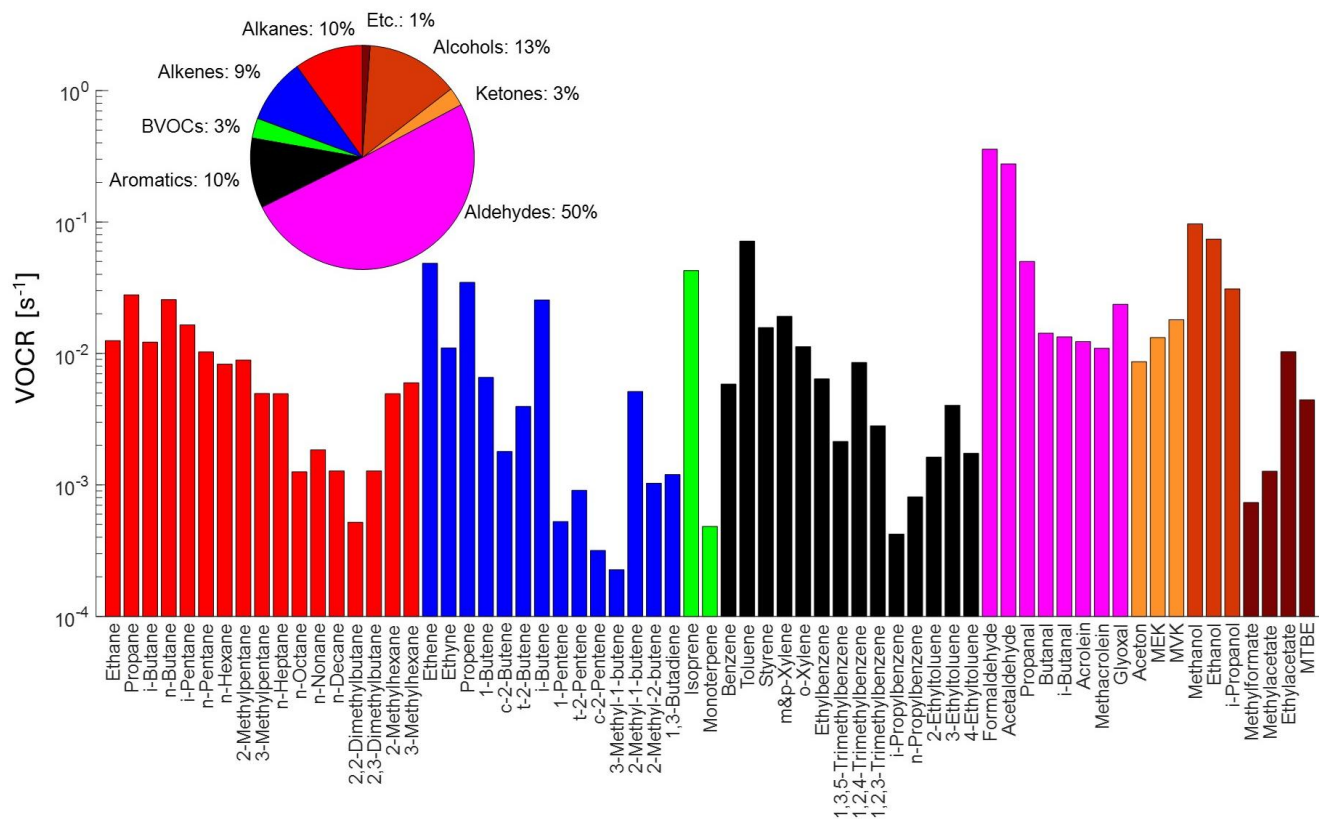

**Figure S3.** Contribution of individual VOC species to VOCR measured in Tainan-Kaohsiung Metropolitan Area (TKMA) below 750 m asl. The pie chart summarizes the average fractional contributions of VOC classes to VOCR.

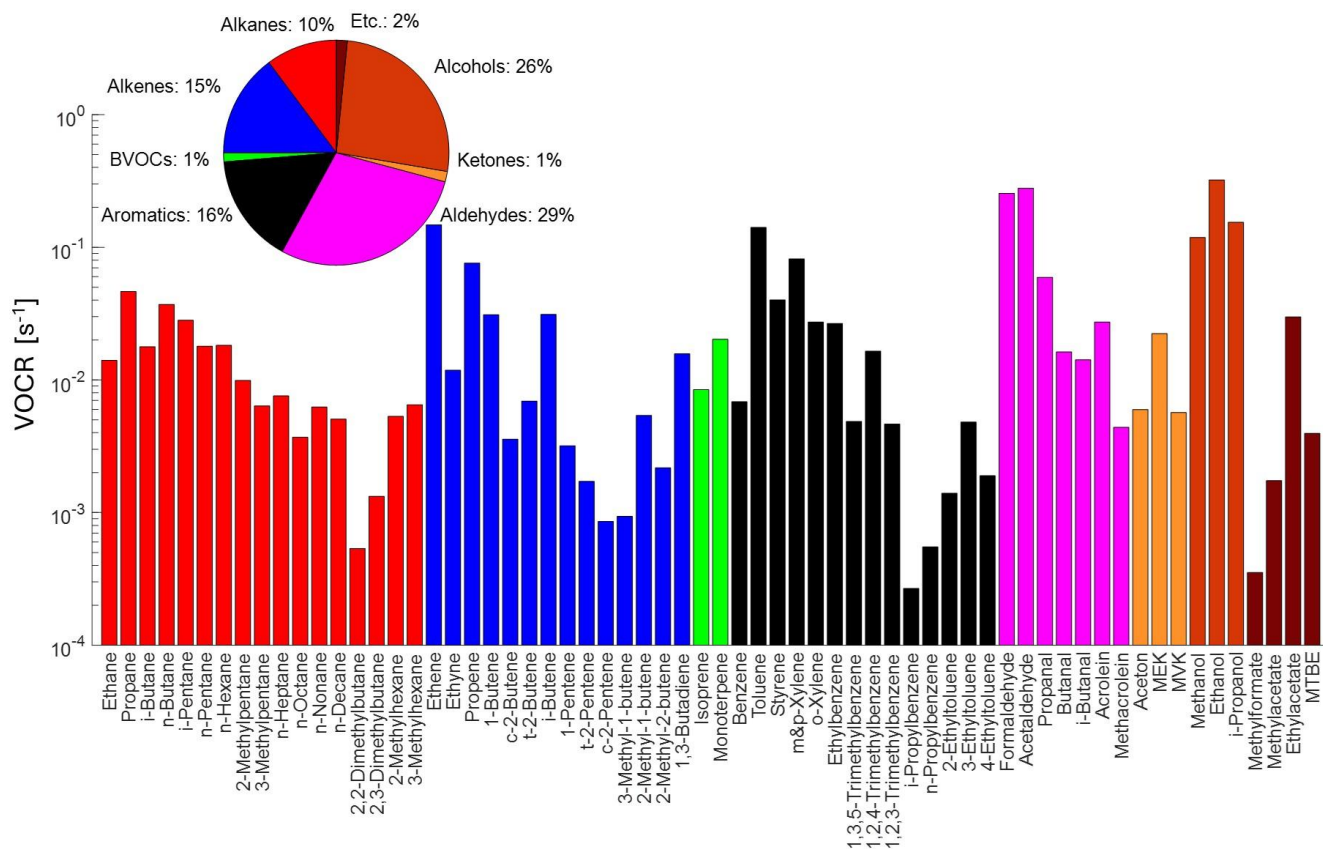

**Figure S4.** Contribution of individual VOC species to VOCR measured in Seoul Metropolitan Area (SMA) below 750 m asl. The pie chart summarizes the average fractional contributions of VOC classes to VOCR.

## S2 Flight steady-state (FSS) box model

40 To assess the representativeness of the isopleth-derived  $\text{PO}_x$ , we compared it with  $\text{PO}_x$  calculated from the flight  
 steady-state (FSS) box model described in previous airborne studies (Crawford et al., 1999; Olson et al., 2006; Schroeder et  
 al., 2020; Kim et al., 2022; Brune et al., 2022; Nault et al., 2024). The FSS model simulates instantaneous photochemical  
 conditions for each observation point with the same model setup as described in Sect. 2.2, while the isopleth framework  
 represents a generalized chemical environment by averaging precursor mixing ratios within each flight track and applying  
 45 systematic  $\text{NO}_x$  and VOC scaling factors (Sect. 2.3).

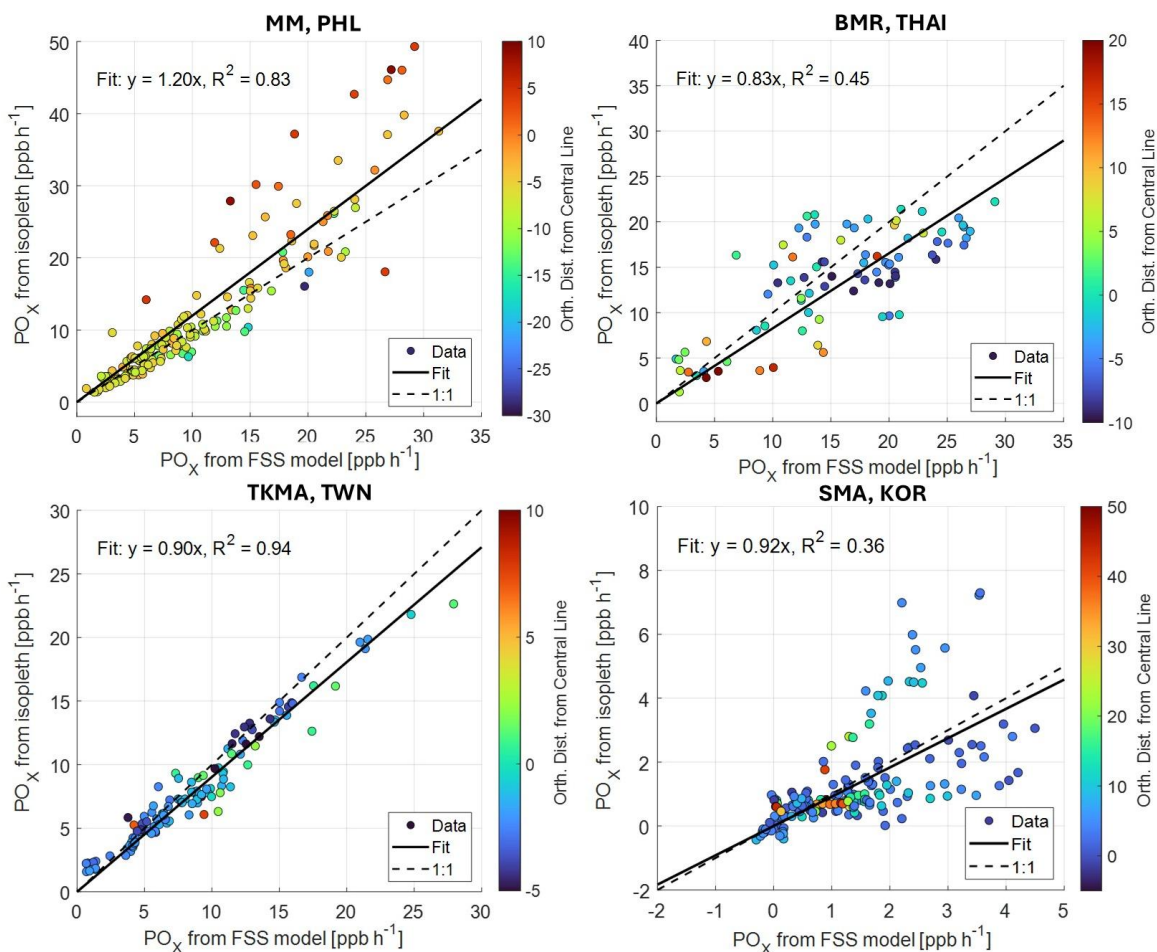

**Figure S5.** Comparisons between  $\text{PO}_x$  derived from the isopleth-based approach and the flight steady-state (FSS) box model for four megacities during ASIA-AQ. Colors indicate orthogonal distance from the central transition line (negative:  $\text{NO}_x$ -sensitive; positive: VOC-sensitive). Solid and dashed lines show the linear fit and 1:1 reference, respectively.

The comparison therefore highlights how regional generalization influences the magnitude and variability of  $\text{PO}_x$  relative to point-specific calculations. Overall, strong linear relationships with generally good agreement (within 20%) were obtained in MM, BMR, and TKMA ( $r^2 = 0.45\text{--}0.94$ ), indicating that the isopleth approach captures the principal  $\text{PO}_x$  features

derived from the more discrete FSS model. In MM, data points within the VOC-sensitive regime showed a tendency toward positive bias relative to the FSS simulations. This behavior likely reflects the assumption of fixed VOC speciation during uniform VOC scaling, which can result in a stronger influence on  $\text{PO}_x$  variability in VOC-sensitive conditions. However, in SMA, the correlation was weaker ( $r^2 = 0.36$ ), mainly influenced by several high-bias points from one flight (RF06, Tracks 1 and 2) that showed the largest dynamic range of  $\text{PO}_x$  in the isopleth (Fig. S8), accompanied by elevated photolysis frequency of  $\text{NO}_2$  ( $j\text{NO}_2$ ) nearly twice as high as those in other research flights (RF06 average:  $0.0071 \pm 0.0015 \text{ s}^{-1}$ ; other RFs average:  $0.0040 \pm 0.0028 \text{ s}^{-1}$ ). Under these conditions, the isopleth-based  $\text{PO}_x$  showed a larger dynamic range (1–7 ppbv  $\text{h}^{-1}$ ) than the point-specific steady-state estimates (1–3.5 ppbv  $\text{h}^{-1}$ ), indicating that the generalized  $\text{NO}_x$  and VOC scaling can amplify variability rather than smoothing it.

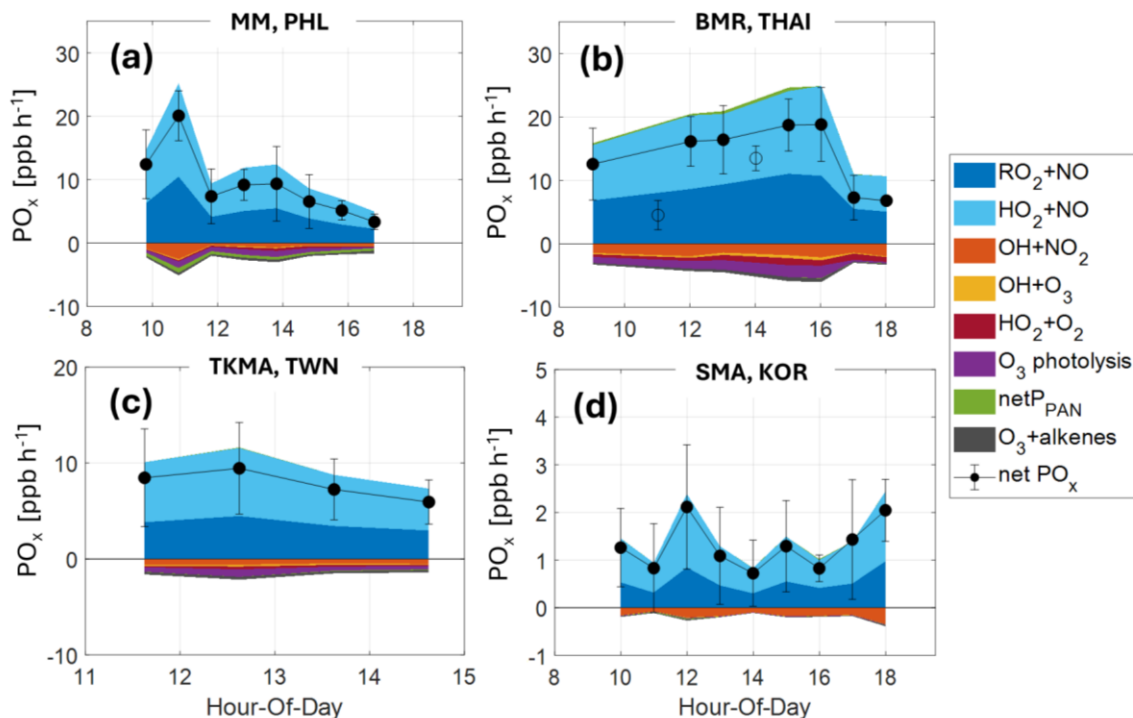

**Figure S6.**  $\text{PO}_x$  budget from FSS box model for four megacities during ASIA-AQ. Colored stacked areas represent the individual terms in Eq. 1. Black dots with error bars show the net  $\text{PO}_x$  (hourly means  $\pm$  standard deviations). Open dots in BMR indicate data points sampled at relatively higher altitudes (same as Figs. 3 and 5(b)). All times are local time (LT).

The FSS box model is also used to diagnose the  $\text{PO}_x$  budget as it provides instantaneous production and destruction rates of each term to contribute to net  $\text{PO}_x$  in Eq. (1). Figure S6 displays the diurnal trends of  $\text{O}_x$  production and loss terms and resulting net  $\text{PO}_x$  in each city. Across all cities,  $\text{O}_x$  production is approximately evenly split between  $\text{RO}_2+\text{NO}$  and  $\text{HO}_2+\text{NO}$ . Loss terms are smaller than productions, dominated by  $\text{OH}+\text{NO}_2$  and  $\text{O}_3$  photolysis (except for SMA due to low solar irradiance), with minor contributions from  $\text{O}_3+\text{alkenes}$ ,  $\text{OH}+\text{O}_3$ , and  $\text{HO}_2+\text{O}_2$ . Net PAN production term ( $\text{netP}_{\text{PAN}}$ ) can act as either a source or a sink of  $\text{PO}_x$ . In BMR,  $\text{netP}_{\text{PAN}}$  is positive, likely reflecting elevated PAN mixing ratios ( $2.7 \pm 1.5$



ppbv) during the biomass-burning period and faster thermal decomposition under warmer conditions, which returns  $\text{NO}_2$ . In  
65 MM and TKMA, negative contributions of  $\text{netP}_{\text{PAN}}$  to  $\text{PO}_x$  suggests the PAN formation dominates. Lastly, in SMA, colder  
conditions limit thermal decomposition of PAN, therefore the PAN term is in the loss. However, overall contributions of  
 $\text{netP}_{\text{PAN}}$  to  $\text{PO}_x$  are small in all locations ( $< 2\%$ ).

## S3.1 Metro Manila (MM), Philippines

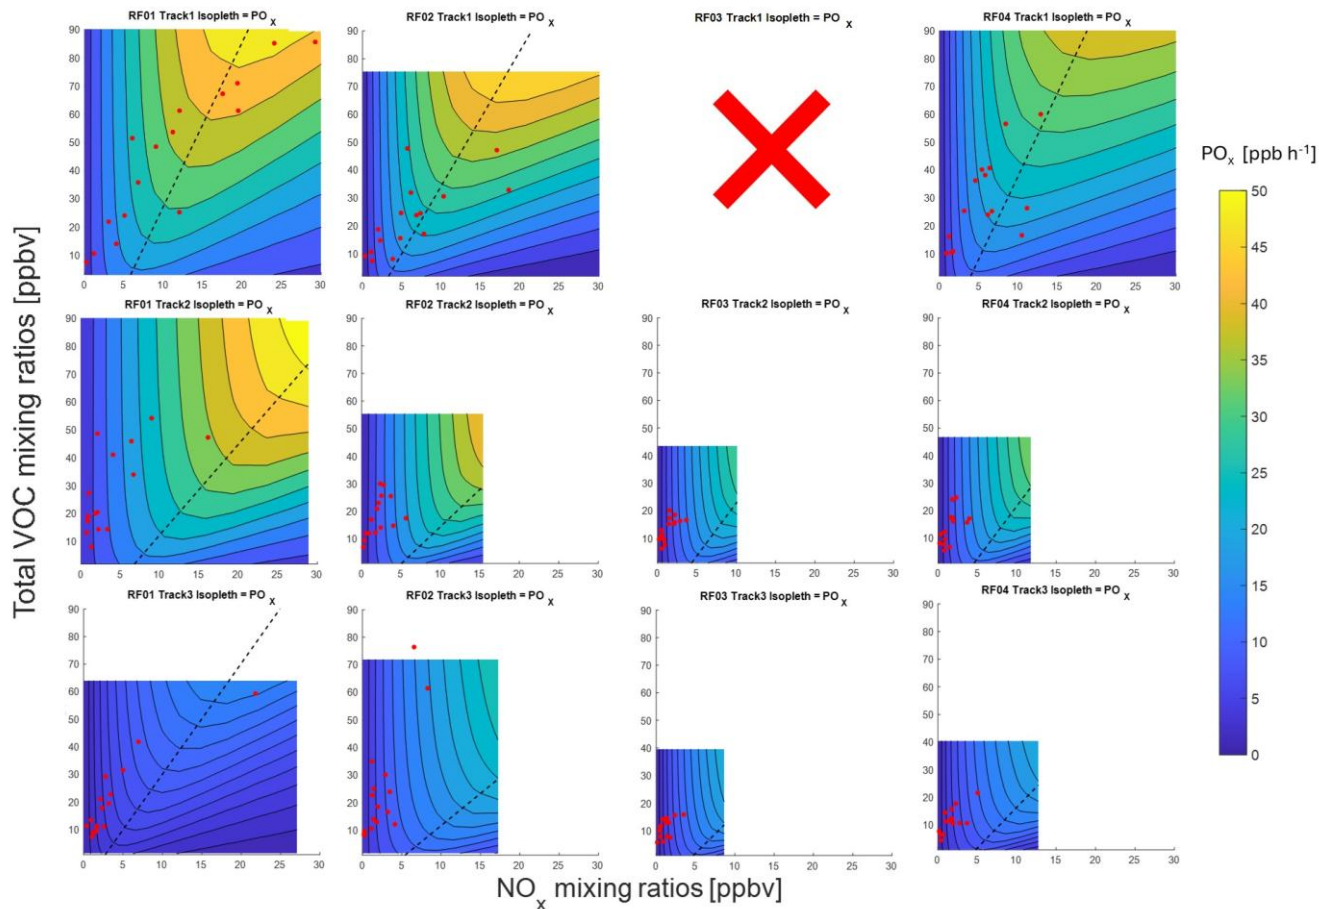

**Figure S7.**  $\text{PO}_x$  isopleths for MM. Plot format follows Fig. 4a in the main manuscript. RF03 Track1 is not available due to missing data.

Four DC-8 research flights (RF01–RF04; Table S1) were performed over the Philippines. Figure S7 presents  $\text{PO}_x$  isopleths for Metro Manila, categorized by research flight and local time: Track 1 (09:00–11:00), Track 2 (11:00–14:00), and Track 3 (14:00–17:00). Data for RF03 Track 1 are excluded due to missing  $\text{NO}_x$  measurements caused by a temporary instrument failure.

### S3.2 Bangkok Metropolitan Region (BMR), Thailand

Four DC-8 research flights (RF12–RF15; Table S1) were performed over Thailand. Figure S8 presents  $\text{PO}_x$  isopleths for BMR, categorized by research flight and local time: Track 1 (09:00–13:00) and Track 2 (13:00–18:00).

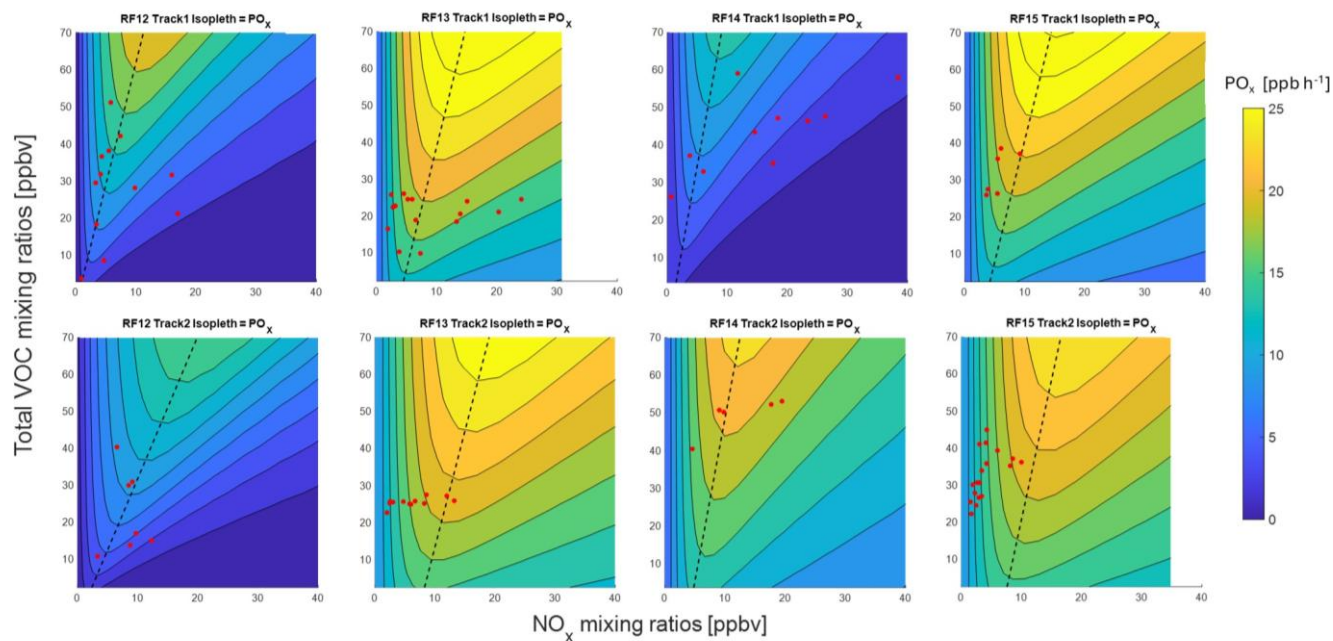

**Figure S8.**  $\text{PO}_x$  isopleths for BMR. Plot format follows Fig. 5a in the main manuscript.

### S3.3 Tainan-Kaohsiung Metropolitan Area (TKMA), Taiwan

Three DC-8 research flights (RF05, RF11, RF16; Table S1) were performed over Taiwan. Figure S9 presents  $\text{PO}_x$  isopleths for BMR, categorized by research flight and local time: Track 1 (11:00–13:00) and Track 2 (13:00–15:00).

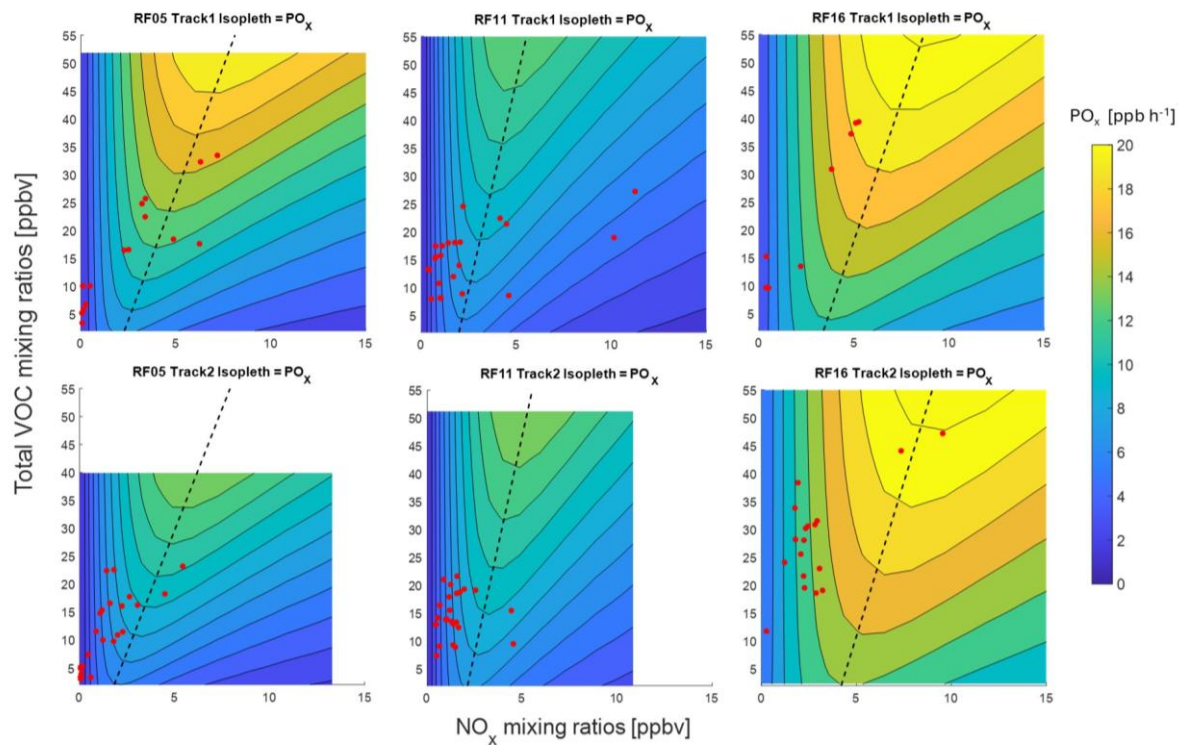

**Figure S9.**  $\text{PO}_x$  isopleths for TKMA. Plot format follows Fig. 6a in the main manuscript.

### S3.4 Seoul Metropolitan Area (SMA), South Korea

90

Five DC-8 research flights (RF06–RF10; Table S1) were performed over South Korea. Figure S10 presents  $\text{PO}_x$  isopleths for SMA, categorized by research flight and local time: Track 1 (10:00–13:00), Track 2 (13:00–16:00), and Track 3 (16:00–19:00). Note that the  $x$ -axis ( $\text{NO}_x$  mixing ratios) is shown on a logarithmic scale to better visualize isopleths.

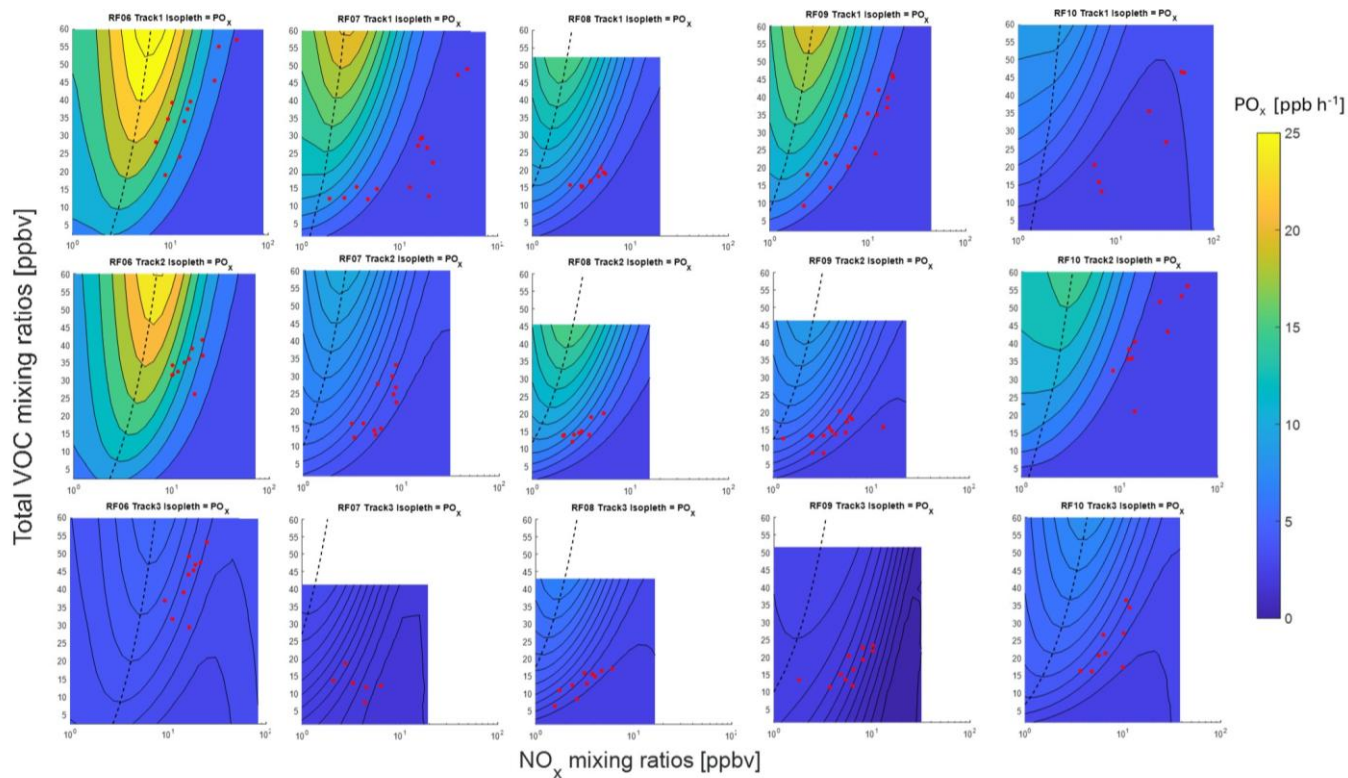

**Figure S10.**  $\text{PO}_x$  isopleths for SMA. Plot format follows Fig. 7a in the main manuscript. The  $x$  axis is in a logarithmic scale.

95 **Table S3.** Slopes of the PO<sub>x</sub> transition line (ridges of maximum PO<sub>x</sub>) from isopleths by city, flight, and track.

| City         | Flight          | Track | Slope | City         | Flight  | Track | Slope |
|--------------|-----------------|-------|-------|--------------|---------|-------|-------|
| MM,<br>PHL   | RF01            | 1     | 5.83  | BMR,<br>THAI | RF12    | 1     | 6.58  |
|              | RF01            | 2     | 3.25  |              | RF12    | 2     | 3.86  |
|              | RF01            | 3     | 4.01  |              | RF13    | 1     | 6.62  |
|              | RF02            | 1     | 4.85  |              | RF13    | 2     | 6.26  |
|              | RF02            | 2     | 2.70  |              | RF14    | 1     | 8.81  |
|              | RF02            | 3     | 2.33  |              | RF14    | 2     | 8.64  |
|              | RF03            | 2     | 3.83  |              | RF15    | 1     | 6.61  |
|              | RF03            | 3     | 2.81  |              | RF15    | 2     | 7.55  |
|              | RF04            | 1     | 5.97  |              | RF12–15 | all   | 7.01  |
|              | RF04            | 2     | 3.82  |              | RF06    | 1     | 14.97 |
|              | RF04            | 3     | 2.95  |              | RF06    | 2     | 12.26 |
|              | RF01–04         | all   | 4.71  |              | RF06    | 3     | 12.40 |
|              | RF05            | 1     | 9.10  |              | RF07    | 1     | 39.99 |
|              | RF05            | 2     | 8.70  |              | RF07    | 2     | 29.15 |
|              | RF11            | 1     | 14.91 |              | RF07    | 3     | 40.07 |
| TKMA,<br>TWN | RF11            | 2     | 15.58 | SMA,<br>KOR  | RF08    | 1     | 29.45 |
|              | RF16            | 1     | 10.05 |              | RF08    | 2     | 21.07 |
|              | RF16            | 2     | 11.05 |              | RF08    | 3     | 26.07 |
|              | RF05, 11,<br>16 | all   | 11.24 |              | RF09    | 1     | 30.07 |
|              |                 |       |       |              | RF09    | 2     | 22.18 |
|              |                 |       |       |              | RF09    | 3     | 20.83 |
|              |                 |       |       |              | RF10    | 1     | 44.01 |
|              |                 |       |       |              | RF10    | 2     | 27.14 |
|              |                 |       |       |              | RF10    | 3     | 16.20 |
|              |                 |       |       |              | RF06–10 | all   | 30.27 |

#### S4 Average vertical distributions of PO<sub>x</sub> sensitivity

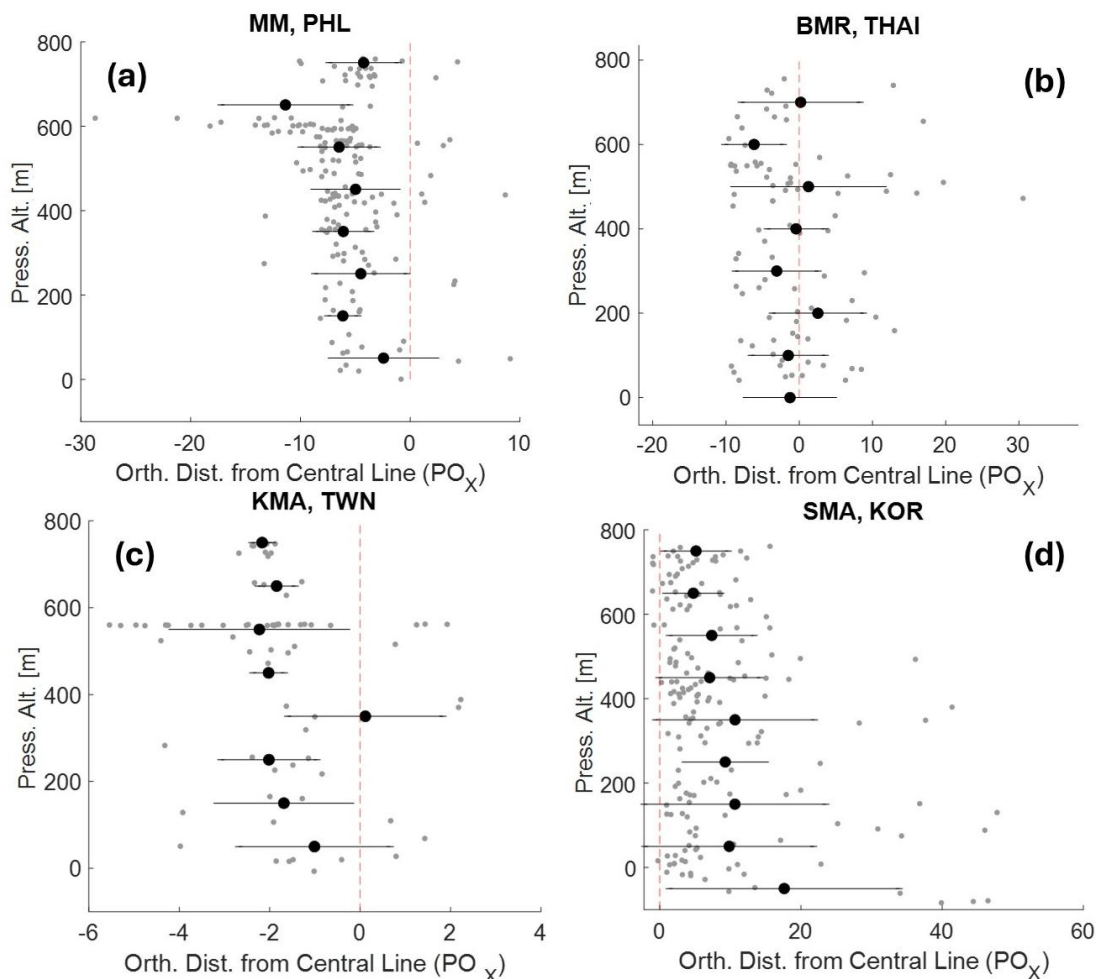

**Figure S11.** Vertical distributions of PO<sub>x</sub> sensitivity, shown as orthogonal distances from the PO<sub>x</sub> transition line, for each megacity. Positive values indicate VOC-sensitive conditions, and negative values indicate NO<sub>x</sub>-sensitive conditions. The red dashed lines denote the transition line. Grey dots indicate individual data points, and black dots and error bars represent the hourly mean values and standard deviations, respectively.

100

We extended the orthogonal-distance analysis (Sect. 2.3) to altitudes up to 750 m pressure altitude (asl). Figure S11 shows the vertical distributions of the computed orthogonal distances (Sect. 2.3) in each megacity. Compared with the diurnal distributions (Figs. 4b, 5b, 6b, and 7b), the altitude-binned orthogonal distances show no clear, monotonic tendency with altitude, suggesting that the air masses below 750 m were relatively well mixed. A slight shift toward more positive values near the surface is apparent with elevated NO<sub>x</sub> levels near ground (Fig. 2).



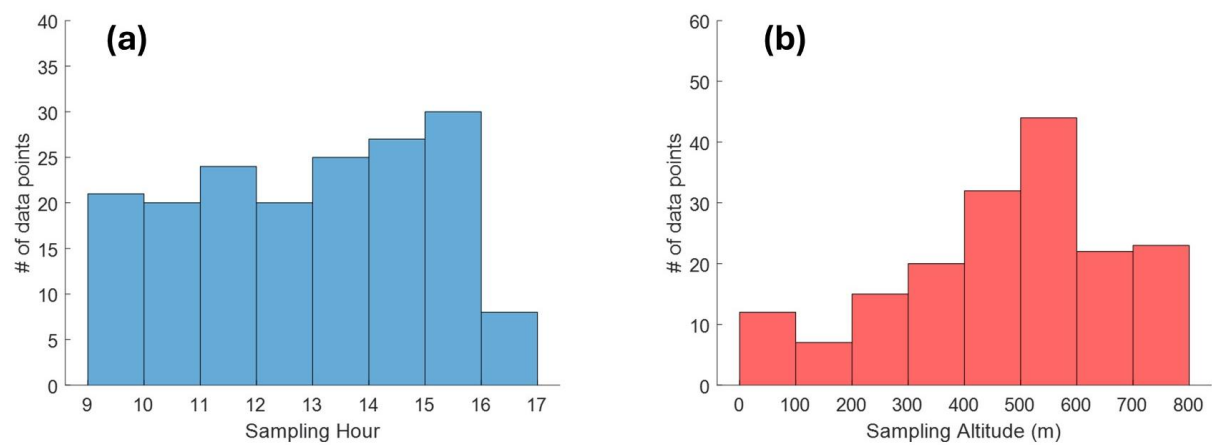

**Figure S12.** Distributions of (a) sampling hours and (b) altitudes for PO<sub>x</sub> sensitivity analysis in MM. The histograms show the number of 1-minute averaged data points.

As noted in the main manuscript (Sect. 4), the temporal and vertical inhomogeneity of airborne sampling can introduce potential biases in the interpretation of ozone production sensitivity across the four studied megacities. Differences in the number and distribution of data points by hour of day and altitude may affect statistical calculations such as regime classification in Table 2 and the modeled impacts of precursor reductions in Fig. 8. Figures S12–S15 illustrate the distributions of 1-minute averaged data points by sampling hour and altitude for each city.

Metro Manila (Fig. S12) shows relatively uniform temporal coverage from 09:00 to 16:00 LT, with a slight drop-off in the late afternoon. According to Fig. 4b, the late afternoon data points generally remain NO<sub>x</sub>-sensitive but lie close to transition line. Vertically, data are skewed toward mid-boundary layer altitudes (400–600 m), with fewer measurements below 200 m. Figure S11a indicates that lower-altitude points also tend to cluster near the transition line. Notably, both late afternoon and low-altitude data are associated with elevated NO<sub>x</sub> and VOC levels (Figs. 2 and 3), suggesting potentially high PO<sub>x</sub> conditions. As a result, this sampling inhomogeneity may lead to an underestimation of data near the transition line under high PO<sub>x</sub> conditions, potentially biasing the analysis toward lower sensitivity and underestimating the effects of precursor reductions shown in Fig. 8a.



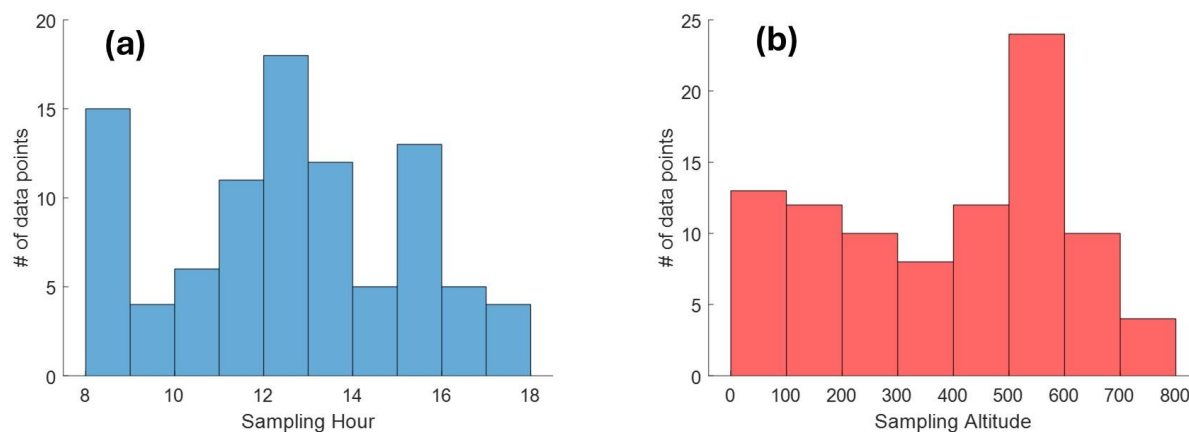

**Figure S13.** Distributions of (a) sampling hours and (b) altitudes for  $\text{PO}_x$  sensitivity analysis in BMR. The histograms show the number of 1-minute averaged data points.

Figure S13 shows the distributions of sampling hours and altitudes for the  $\text{PO}_x$  sensitivity analysis in the Bangkok Metropolitan Region (BMR). While the overall temporal distribution appears uneven, the sampling is relatively homogeneous when divided into broader time blocks (morning and afternoon). One notable limitation is the reduced number of data points after 16:00 LT, which may limit the representation of late-afternoon chemistry. Therefore, the potential influence of VOC-sensitive points in late-afternoon (Fig. 5b) might be underestimated in Table 2 and Fig. 8b. The vertical distribution of orthogonal distances is uniform across altitudes (Fig. S11b), suggesting that vertical sampling inhomogeneity has minimal influence on the sensitivity classification (Table 2) and  $\text{PO}_x$  reduction estimation (Fig. 8b).

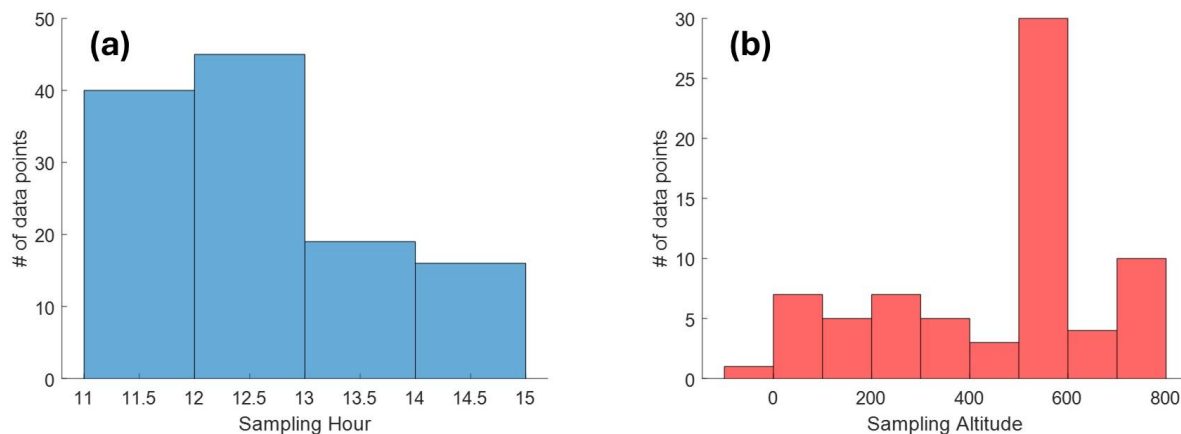

**Figure S14.** Distributions of (a) sampling hours and (b) altitudes for  $\text{PO}_x$  sensitivity analysis in TKMA. The histograms show the number of 1-minute averaged data points.

Tainan-Kaohsiung Metropolitan Area (Fig. S14) exhibits the narrowest sampling window among the studied cities, with data collected only between 11:00 and 15:00 LT. As discussed in Sect. 4.1.1, missing early morning sampling may result in an underestimation of the effect of the VOC-sensitive points (Fig. 6) and VOC reduction (Fig. 8c). Vertically, the data are concentrated between 500 m and 600 m. While this altitude range shows a widespread in orthogonal distances (Fig. S11c), the vertical distribution of  $\text{PO}_x$  sensitivity is generally uniform, except for slightly more VOC-sensitive conditions around 300–400 m. Therefore, the effect of vertical inhomogeneity is expected to be minor.

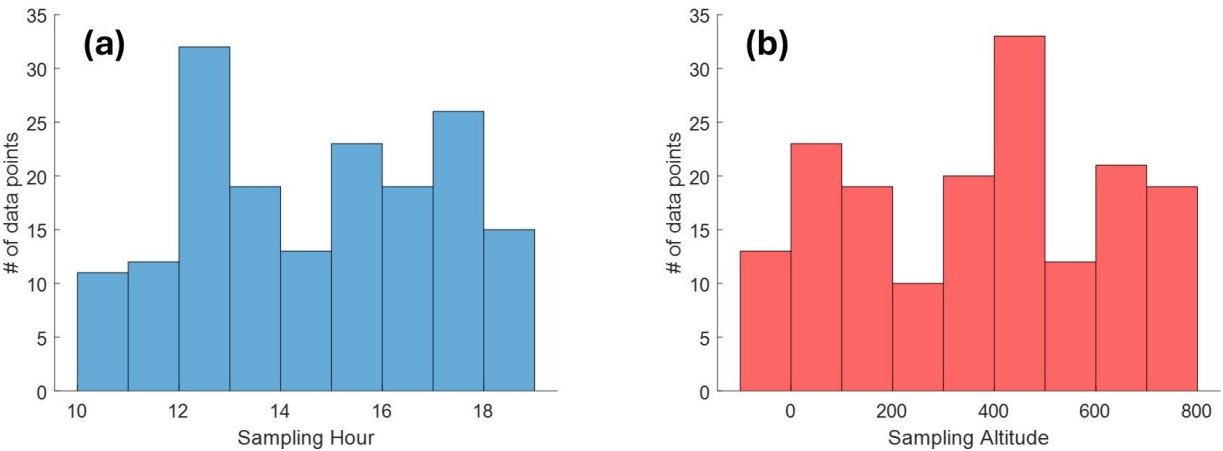

**Figure S15.** Distributions of (a) sampling hours and (b) altitudes for  $\text{PO}_x$  sensitivity analysis in SMA. The histograms show the number of 1-minute averaged data points.

The Seoul Metropolitan Area (Fig. S15) shows relatively well-distributed sampling both temporally and vertically. As shown in Fig. S11d, the calculated orthogonal distances remain consistently positive across altitudes. Similarly, Fig. 7b confirms limited diurnal variation in  $\text{PO}_x$  sensitivity. These patterns suggest that sampling inhomogeneity has minimal impact on the regime classification or  $\text{PO}_x$  reduction analysis in SMA.

## S6 Ozone production sensitivity in SMA during KORUS-AQ

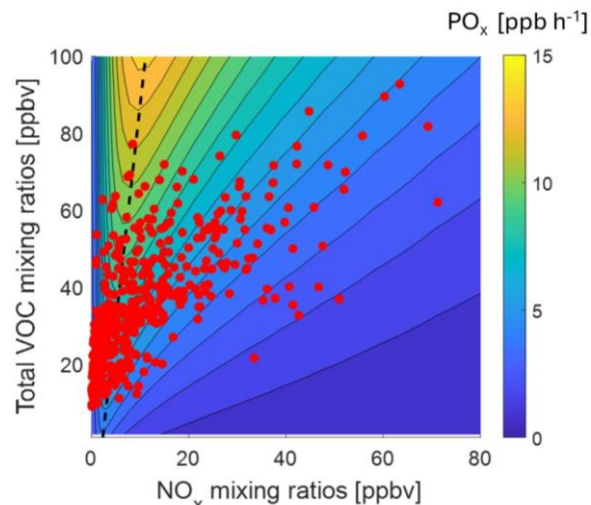

**Figure S16.** Colored isopleth of ozone production rate ( $PO_x$ ) as functions of  $NO_x$  and VOC mixing ratios in the Seoul Metropolitan Area (SMA) during KORUS-AQ (April–June 2016). The dashed lines denote the transition between  $NO_x$ -sensitive (left area of the transition) and VOC-sensitive (right area of the transition) regimes. Red dots indicate the observed data points sampled below 750 m.

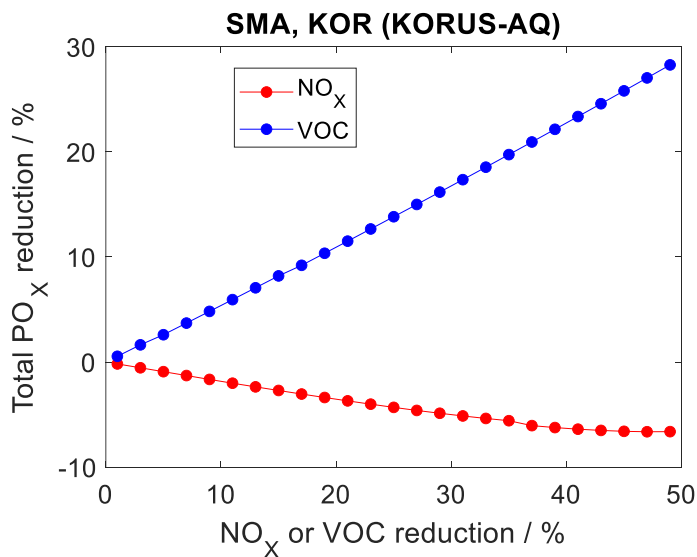

**Figure S17.** Sensitivity of total  $PO_x$  reduction (%) to  $NO_x$  and VOC reductions (%) in SMA during KORUS-AQ. Red and blue lines and markers represent the response of  $PO_x$  to  $NO_x$  and VOC reductions, respectively.

**Table S4.** Fractions of NO<sub>x</sub>-sensitive and VOC-sensitive regimes for PO<sub>x</sub> in SMA during KORUS-AQ.

| Location                          | Regime                 | % of Points | ΣPO <sub>x</sub> Contribution | % of Points                          | ΣPO <sub>x</sub> Contribution        |
|-----------------------------------|------------------------|-------------|-------------------------------|--------------------------------------|--------------------------------------|
|                                   |                        | (All data)  | (All data)                    | (High PO <sub>x</sub> <sup>a</sup> ) | (High PO <sub>x</sub> <sup>a</sup> ) |
| SMA,<br>South Korea<br>(KORUS-AQ) | NO <sub>x</sub> -sens. | 41%         | 37%                           | 32%                                  | 32%                                  |
|                                   | VOC-sens.              | 59%         | 63%                           | 68%                                  | 68%                                  |

<sup>a</sup> High PO<sub>x</sub> denotes upper 50% of the PO<sub>x</sub> distribution (above the median).

## References

- 155 Apel, E. C., Hornbrook, R. S., Hills, A. J., Blake, N. J., Barth, M. C., Weinheimer, A., Cantrell, C., Rutledge, S. A., Basarab, B., Crawford, J., Diskin, G., Homeyer, C. R., Campos, T., Flocke, F., Fried, A., Blake, D. R., Brune, W., Pollack, I., Peischl, J., Ryerson, T., Wennberg, P. O., Crounse, J. D., Wisthaler, A., Mikoviny, T., Huey, G., Heikes, B., O'Sullivan, D., and Riemer, D. D.: Upper tropospheric ozone production from lightning NO<sub>x</sub>-impacted convection: Smoke ingestion case study from the DC3 campaign, *J. Geophys. Res.- Atmos.*, 120, 2505–2523, <https://doi.org/10.1002/2014JD022121>, 2015.
- 160 Bailey, S. A., Hannun, R. A., Swanson, A. K., and Hanisco, T. F.: A portable nitrogen dioxide instrument using cavity-enhanced absorption spectroscopy, *Atmos. Meas. Tech.*, 17, 5903–5910, <https://doi.org/10.5194/amt-17-5903-2024>, 2024.
- Brune, W. H., Miller, D. O., Thames, A. B., Brosius, A. L., Barletta, B., Blake, D. R., Blake, N. J., Chen, G., Choi, Y., Crawford, J. H., Digangi, J. P., Diskin, G., Fried, A., Hall, S. R., Hanisco, T. F., Huey, G. L., Hughes, S. C., Kim, M., Meinardi, S., Montzka, D. D., Pusede, S. E., Schroeder, J. R., Teng, A., Tanner, D. J., Ullmann, K., Walega, J., Weinheimer, A.,  
165 Wisthaler, A., and Wennberg, P. O.: Observations of atmospheric oxidation and ozone production in South Korea, *Atmos. Environ.*, 269, 118854, <https://doi.org/10.1016/j.atmosenv.2021.118854>, 2022.
- Cazorla, M., Wolfe, G. M., Bailey, S. A., Swanson, A. K., Arkinson, H. L., and Hanisco, T. F.: A new airborne laser-induced fluorescence instrument for in situ detection of formaldehyde throughout the troposphere and lower stratosphere, *Atmos. Meas. Tech.*, 8, 541–552, <https://doi.org/10.5194/amt-8-541-2015>, 2015.
- 170 Crawford, J., Davis, D., Olson, J., Chen, G., Liu, S., Gregory, G., Barrick, J., Sachse, G., Sandholm, S., Heikes, B., Singh, H., and Blake, D.: Assessment of upper tropospheric HO<sub>x</sub> sources over the tropical Pacific based on NASA GTE/PEM data: Net effect on HO<sub>x</sub> and other photochemical parameters, *J. Geophys. Res.-Atmos.*, 104, 16255–16273, <https://doi.org/10.1029/1999JD900106>, 1999.
- Crounse, J. D., McKinney, K. A., Kwan, A. J., and Wennberg, P. O.: Measurement of Gas-Phase Hydroperoxides by Chemical  
175 Ionization Mass Spectrometry, *Anal. Chem.*, 78, 6726–6732, <https://doi.org/10.1021/ac0604235>, 2006.
- Diskin, Glenn S., Podolske, James R., Sachse, Glen William, and Slate, Thomas A.: Open-path airborne tunable diode laser hygrometer, *Proc. SPIE*, 196–204, <https://doi.org/10.1117/12.453736>, 2002.
- Gaines, S. E., Bowen, S. W., Hipskind, R. S., Bui, T. P., and Chan, K. R.: Comparisons of the NASA ER-2 Meteorological Measurement System with Radar Tracking and Radiosonde Data, *J. Atmospheric Ocean. Technol.*, 9, 210–225, [https://doi.org/10.1175/1520-0426\(1992\)009%253C0210:COTNEM%253E2.0.CO;2](https://doi.org/10.1175/1520-0426(1992)009%253C0210:COTNEM%253E2.0.CO;2), 1992.  
180
- Hall, S. R., Ullmann, K., Prather, M. J., Flynn, C. M., Murray, L. T., Fiore, A. M., Correa, G., Strode, S. A., Steenrod, S. D., Lamarque, J.-F., Guth, J., Josse, B., Flemming, J., Huijnen, V., Abraham, N. L., and Archibald, A. T.: Cloud impacts on photochemistry: building a climatology of photolysis rates from the Atmospheric Tomography mission, *Atmos Chem Phys*, 18, 16809–16828, <https://doi.org/10.5194/acp-18-16809-2018>, 2018.
- 185 Hannun, R. A., Swanson, A. K., Bailey, S. A., Hanisco, T. F., Bui, T. P., Bourgeois, I., Peischl, J., and Ryerson, T. B.: A cavity-enhanced ultraviolet absorption instrument for high-precision, fast-time-response ozone measurements, *Atmos. Meas. Tech.*, 13, 6877–6887, <https://doi.org/10.5194/amt-13-6877-2020>, 2020.
- Jeong, D., Hornbrook, R. S., Hills, A. J., Diskin, G., Halliday, H. S., DiGangi, J. P., Fried, A., Richter, D., Walega, J., Weibring, P., Hanisco, T. F., Wolfe, G. M., St. Clair, J., Peischl, J., Wisthaler, A., Mikoviny, T., Nowak, J. B., Piel, F., Tomsche, L.,  
190 Holmes, C. D., Soja, A., Gargulinski, E., Crawford, J. H., Dibb, J., Warneke, C., Schwarz, J., and Apel, E. C.: Trace Organic Gas Analyzer Time-of-Flight mass spectrometer (TOGA-TOF) system for airborne observations of formaldehyde, *EGUsphere*, 2025, 1–34, <https://doi.org/10.5194/egusphere-2025-4703>, 2025.

- Kim, D., Cho, C., Jeong, S., Lee, S., Nault, B. A., Campuzano-Jost, P., Day, D. A., Schroder, J. C., Jimenez, J. L., Volkamer, R., Blake, D. R., Wisthaler, A., Fried, A., DiGangi, J. P., Diskin, G. S., Pusede, S. E., Hall, S. R., Ullmann, K., Huey, L. G.,  
195 Tanner, D. J., Dibb, J., Knote, C. J., and Min, K.-E.: Field observational constraints on the controllers in glyoxal (CHOCHO) reactive uptake to aerosol, *Atmos. Chem. Phys.*, 22, 805–821, <https://doi.org/10.5194/acp-22-805-2022>, 2022.
- Lee, Y. R., Ji, Y., Tanner, D. J., and Huey, L. G.: A low-activity ion source for measurement of atmospheric gases by chemical ionization mass spectrometry, *Atmos. Meas. Tech.*, 13, 2473–2480, <https://doi.org/10.5194/amt-13-2473-2020>, 2020.
- Min, K.-E., Washenfelder, R. A., Dubé, W. P., Langford, A. O., Edwards, P. M., Zarzana, K. J., Stutz, J., Lu, K., Rohrer, F.,  
200 Zhang, Y., and Brown, S. S.: A broadband cavity enhanced absorption spectrometer for aircraft measurements of glyoxal, methylglyoxal, nitrous acid, nitrogen dioxide, and water vapor, *Atmos. Meas. Tech.*, 9, 423–440, <https://doi.org/10.5194/amt-9-423-2016>, 2016.
- Nault, B. A., Travis, K. R., Crawford, J. H., Blake, D. R., Campuzano-Jost, P., Cohen, R. C., DiGangi, J. P., Diskin, G. S.,  
205 Hall, S. R., Huey, L. G., Jimenez, J. L., Min, K.-E., Lee, Y. R., Simpson, I. J., Ullmann, K., and Wisthaler, A.: Using observed urban NO<sub>x</sub> sinks to constrain VOC reactivity and the ozone and radical budget in the Seoul Metropolitan Area, *Atmos. Chem. Phys.*, 24, 9573–9595, <https://doi.org/10.5194/acp-24-9573-2024>, 2024.
- Olson, J. R., Crawford, J. H., Chen, G., Brune, W. H., Faloona, I. C., Tan, D., Harder, H., and Martinez, M.: A reevaluation of airborne HO<sub>x</sub> observations from NASA field campaigns, *J. Geophys. Res.-Atmos.*, 111, <https://doi.org/10.1029/2005JD006617>, 2006.
- 210 Reinecke, T., Leiminger, M., Jordan, A., Wisthaler, A., and Müller, M.: Ultrahigh Sensitivity PTR-MS Instrument with a Well-Defined Ion Chemistry, *Anal. Chem.*, 95, 11879–11884, <https://doi.org/10.1021/acs.analchem.3c02669>, 2023.
- Ridley, B. A. and Grahek, F. E.: A Small, Low Flow, High Sensitivity Reaction Vessel for NO Chemiluminescence Detectors, *J. Atmos. Ocean. Technol.*, 7, 307–311, [https://doi.org/10.1175/1520-0426\(1990\)007%253C0307:ASLFHS%253E2.0.CO;2](https://doi.org/10.1175/1520-0426(1990)007%253C0307:ASLFHS%253E2.0.CO;2), 1990.
- 215 Ridley, B. A., Grahek, F. E., and Walega, J. G.: A Small High-Sensitivity, Medium-Response Ozone Detector Suitable for Measurements from Light Aircraft, *J. Atmospheric Ocean. Technol.*, 9, 142–148, [https://doi.org/10.1175/1520-0426\(1992\)009%253C0142:ASHSMR%253E2.0.CO;2](https://doi.org/10.1175/1520-0426(1992)009%253C0142:ASHSMR%253E2.0.CO;2), 1992.
- Sachse, G. W., Hill, G. F., Wade, L. O., and Perry, M. G.: Fast-response, high-precision carbon monoxide sensor using a tunable diode laser absorption technique, *J. Geophys. Res.-Atmos.*, 92, 2071–2081, <https://doi.org/10.1029/JD092iD02p02071>, 1987.
- 220 Schroeder, J. R., Crawford, J. H., Ahn, J.-Y., Chang, L., Fried, A., Walega, J., Weinheimer, A., Montzka, D. D., Hall, S. R., Ullmann, K., Wisthaler, A., Mikoviny, T., Chen, G., Blake, D. R., Blake, N. J., Hughes, S. C., Meinardi, S., Diskin, G., Digangi, J. P., Choi, Y., Pusede, S. E., Huey, G. L., Tanner, D. J., Kim, M., and Wennberg, P.: Observation-based modeling of ozone chemistry in the Seoul metropolitan area during the Korea-United States Air Quality Study (KORUS-AQ), *Elem. Sci. Anthr.*, 8, 3, <https://doi.org/10.1525/elementa.400>, 2020.
- 225 Simpson, I. J., Blake, D. R., Blake, N. J., Meinardi, S., Barletta, B., Hughes, S. C., Fleming, L. T., Crawford, J. H., Diskin, G. S., Emmons, L. K., Fried, A., Guo, H., Peterson, D. A., Wisthaler, A., Woo, J.-H., Barré, J., Gaubert, B., Kim, J., Kim, M. J., Kim, Y., Knote, C., Mikoviny, T., Pusede, S. E., Schroeder, J. R., Wang, Y., Wennberg, P. O., and Zeng, L.: Characterization, sources and reactivity of volatile organic compounds (VOCs) in Seoul and surrounding regions during KORUS-AQ, *Elem. Sci. Anthr.*, 8, 37, <https://doi.org/10.1525/elementa.434>, 2020.
- 230
